# Supplementary material for: Classifying California’s stream thermal regimes for cold-water conservation
Source: PLoS One. 2021 Aug 20;16(8):e0256286. doi: 10.1371/journal.pone.0256286 (PMC8378740; doi:10.1371/journal.pone.0256286)
Supplement: S1 Table — (CSV) [file pone.0256286.s001.csv]

station_id	site_name	lon	lat	HR_NAME	operator	data_source	date_begin	date_end	k5_names	ann_mean	ann_max	DOWY	dist_to_centroid	reg_type
10265150	NA	-118.8176312	37.66882166	South Lahontan	USGS	USGS	1982-11-16	2019-04-30	1-stable warm	27.180945175131356	28.714587790034738	353	22.924417773154055	UNREG
10336610	NA	-119.9915706	38.9224078	North Lahontan	USGS	USGS	1970-06-05	2019-06-14	4-variable cool	7.816169883996869	16.118596592264538	305	3.52474287036468	UNREG
10336780	NA	-119.9724036	38.9199077	North Lahontan	USGS	USGS	1973-11-09	2019-05-19	4-variable cool	6.021815904714883	12.340475365104624	298	6.332622411036648	UNREG
11176900	NA	-121.8830126	37.62659915	San Francisco Bay	USGS	USGS	1960-11-15	2018-05-01	2-variable warm	16.79554720720454	23.990903414711276	287	5.852108985823554	UNREG
11261100	NA	-120.8521446	37.24771864	San Joaquin River	USGS	USGS	1984-09-12	2017-08-24	2-variable warm	18.203696846668286	26.152946754557483	288	7.055314924670373	UNREG
11261500	NA	-120.9310369	37.3099386	San Joaquin River	USGS	USGS	1955-07-01	2016-08-17	2-variable warm	18.253741571623696	26.637501144455328	288	7.439034652936614	UNREG
11262900	NA	-120.9065908	37.26244	San Joaquin River	USGS	USGS	1985-06-11	2017-08-24	2-variable warm	18.465053683104998	26.541143668922878	288	7.301487518793599	UNREG
11274550	NA	-121.0138193	37.43187949	San Joaquin River	USGS	USGS	1962-01-18	2016-10-05	2-variable warm	17.905901780525483	25.76308375011258	290	6.840146487584748	UNREG
11290000	NA	-120.9843777	37.627153	San Joaquin River	USGS	USGS	1985-06-24	2017-08-30	2-variable warm	17.213317059634573	24.57176131691851	294	6.19134043210528	REG
11303000	NA	-121.1104934	37.72965078	San Joaquin River	USGS	USGS	1985-06-24	2017-05-11	3-stable cool	14.694641703842219	19.3963947782333	301	3.999682831806225	REG
11303500	NA	-121.2663293	37.6760406	San Joaquin River	USGS	USGS	1950-12-02	2019-07-01	2-variable warm	16.74727043625027	23.754815368113064	292	5.765478581912128	UNREG
11304810	NA	-121.3302245	37.93547987	San Joaquin River	USGS	USGS	2010-03-16	2019-04-23	2-variable warm	17.63124166274219	24.795083853305034	297	6.023807192712916	UNREG
11390500	NA	-121.82469	39.00989476	Sacramento River	USGS	USGS	1985-08-13	2017-09-06	2-variable warm	15.150258055069601	20.979215983099145	293	4.5026976144835915	UNREG
11447650	NA	-121.5013437	38.45601954	Sacramento River	USGS	USGS	1958-11-07	2019-06-24	2-variable warm	15.730824617588853	22.346363845634272	296	5.2141106012500975	REG
11455165	NA	-121.6308333	38.29166667	Sacramento River	USGS	USGS	2008-10-09	2019-05-21	2-variable warm	16.292499948259987	22.859779417376785	296	5.246384425269422	UNREG
11467000	NA	-122.9277737	38.50852336	North Coast	USGS	USGS	1951-04-13	2016-05-25	2-variable warm	16.11994576540045	22.439118583001594	294	4.970906654771016	REG
11468900	NA	-123.991423	40.139309	North Coast	USGS	USGS	2001-07-12	2017-09-26	2-variable warm	16.11994576540045	22.439118583001594	294	4.970906654771016	UNREG
AFD	AMERICAN R BELOW FOLSOM DAM	-121.1667	38.6883	Sacramento River	US Geological Survey	CDEC	1998-12-10	2019-10-01	3-stable cool	12.969511757535848	17.070961259930847	331	4.364788267063758	REG
BAS	SOUTH FORK BATTLE CREEK NEAR MANTON	-121.980675	40.405804	Sacramento River	CA Dept of Water Resources/North Region Office	CDEC	2007-11-21	2019-10-01	3-stable cool	12.033476494027202	17.210965426151134	294	5.196224811845547	UNREG
BBQ	STONEY CK BLW BLACK BUTTE DAM	-122.3239	39.818600000000004	Sacramento River	US Army Corps of Engineers	CDEC	2010-01-20	2019-10-01	2-variable warm	15.665699562778572	23.82010709149104	304	5.595010872896977	REG
BCD	BUTTE CREEK NR DURHAM	-121.777481	39.678013	Sacramento River	CA Dept of Water Resources/North Region Office	CDEC	1998-07-29	2019-10-01	2-variable warm	14.195078805132969	22.607305203784158	301	4.600966496408334	UNREG
BIC	BIG CHICO CREEK NEAR CHICO	-121.778603	39.768417	Sacramento River	CA Dept of Water Resources/North Region Office	CDEC	1998-09-10	2014-12-01	2-variable warm	14.28186515914621	22.535879848834075	295	4.727689525664498	UNREG
BNF	NORTH FORK BATTLE CREEK NEAR MANTON	-121.986946	40.424332	Sacramento River	CA Dept of Water Resources/North Region Office	CDEC	1999-12-29	2019-10-01	3-stable cool	12.600723298564413	17.166008113450026	294	5.273705789941819	REG
BSF	SACRAMENTO RIVER AT BALLS FERRY BRIDGE	-122.193	40.417	Sacramento River	US Bureau of Reclamation	CDEC	1990-02-02	2019-10-01	3-stable cool	11.644825784246342	13.444709850181175	315	6.940913138705817	REG
BWC	BUTTE CREEK NR WESTERN CANAL	-121.83651	39.555721	Sacramento River	CA Dept of Water Resources	CDEC	1998-08-27	2012-03-12	2-variable warm	14.517971186370897	22.11935200240226	300	4.987735714816376	UNREG
CCR	SACRAMENTO RIVER ABOVE CLEAR CK	-122.356	40.538	Sacramento River	US Bureau of Reclamation	CDEC	1997-08-08	2019-10-01	3-stable cool	11.107498300488494	12.477093750622426	338	7.9992188811650875	REG
CDM	EF RUSSIAN R BLW COYOTE DAM	-123.1864	39.1975	North Coast	US Army Corps of Engineers	CDEC	2010-01-20	2019-10-01	3-stable cool	13.83830299386214	17.567320844817658	358	3.3476315178796874	REG
CLP	STANISLAUS R AT COLLIERVILLE POWERHOUSE	-120.378	38.143	San Joaquin River	CA Dept of Fish and Wildlife	CDEC	2001-03-09	2011-11-04	4-variable cool	11.544215456634836	17.933636925189177	309	4.195426339548912	UNREG
CRS	MERCED RIVER AT CRESSY	-120.663	37.425	San Joaquin River	CA Dept of Water Resources/South Central Region Office	CDEC	2000-10-25	2019-10-01	2-variable warm	17.024417549449723	24.2862401321283	295	6.056789054743696	REG
DGC	TRINITY RIVER AT DOUGLAS CITY	-122.956665	40.645279	North Coast	US Geological Survey & US Bureau of Reclamation	CDEC	2005-08-16	2019-10-01	3-stable cool	10.00954476458574	13.92254167968909	296	5.917699631984836	REG
DLT	SACRAMENTO RIVER AT DELTA	-122.417236	40.939594	Sacramento River	US Geological Survey & US Bureau of Reclamation	CDEC	1989-11-13	2019-10-01	4-variable cool	11.80722665669962	18.75546393476122	301	3.7955639372733874	REG
DNB	SAN JOAQUIN R AT DONNY BRIDGE	-119.9658	36.8335	San Joaquin River	US Bureau of Reclamation	CDEC	2004-06-16	2019-10-01	2-variable warm	17.033594862753006	23.957642806092835	295	5.726213376623475	REG
DVD	DEER CREEK BELOW STANFORD VINA DAM	-122.034363	39.963615	Sacramento River	CA Dept of Water Resources/North Region Office	CDEC	1997-10-03	2019-10-01	2-variable warm	15.840025228869418	25.85866354670666	300	6.751722416348041	UNREG
FHH	FALLS CK NR HETCH HETCHY	-119.7633	37.9708	San Joaquin River	City and County of San Francisco	CDEC	2010-09-28	2019-10-01	4-variable cool	9.572360224284116	17.869651014260352	317	0.9895208266182748	UNREG
FRA	FEATHER RIVER AT MILE 61.6	-121.597	39.468	Sacramento River	CA Dept of Water Resources/O&M Oroville Field Division	CDEC	2002-01-01	2019-10-01	3-stable cool	12.662696837674657	16.522515783316514	295	5.3406060431899105	REG
FWQ	SAN JOAQUIN R AT FRIANT DAM-WQ	-119.7061	36.9993	San Joaquin River	US Bureau of Reclamation	CDEC	2010-04-02	2019-10-01	3-stable cool	11.940577890391891	14.635440109240633	365	6.32250513332983	REG
GDC	STANISLAUS R AT GOODWIN CANYON	-120.635	37.858	San Joaquin River	CA Dept of Fish and Wildlife	CDEC	2001-03-09	2011-08-29	3-stable cool	11.559490254988022	12.997146483710587	326	7.460743386018499	REG
GMB	STANISLAUS R AT GAMBINI PROPERTY	-120.888	37.772	San Joaquin River	CA Dept of Fish and Wildlife	CDEC	2001-03-09	2011-08-30	3-stable cool	13.610074798531407	17.407490773383934	303	4.770238222085723	REG
GRF	SAN JOAQUIN RIVER AT GRAVELLY FORD	-120.16	36.798	San Joaquin River	US Bureau of Reclamation	CDEC	2010-08-18	2019-10-01	2-variable warm	17.367605804694016	25.181231246278344	296	6.535779494003574	REG
GVI	GRASS VALLEY CREEK INFLOW	-122.752	40.621	North Coast	US Bureau of Reclamation	CDEC	1999-01-12	2019-10-01	4-variable cool	7.7398255511519	12.440232803169181	302	5.762370804144681	UNREG
GVO	GRASS VALLEY CREEK	-122.76	40.625	North Coast	US Bureau of Reclamation	CDEC	1999-02-01	2019-10-01	4-variable cool	10.852192371019393	17.64828993929852	310	3.286769896222629	REG
GVT	GRASS VALLEY CK NR LEWISTON H2O TEMP	-122.86	40.6867	North Coast	US Bureau of Reclamation	CDEC	2004-12-13	2019-10-01	3-stable cool	11.552345244400541	16.022348999707162	303	5.699932643803558	REG
H41	SAN JOAQUIN R AT HWY 41	-119.7932	36.8762	San Joaquin River	US Bureau of Reclamation	CDEC	2005-08-18	2019-10-01	3-stable cool	14.224397660192556	18.075046845155445	309	4.0975502012073965	REG
HIQ	FRESNO R BLW HIDDEN DAM	-119.8869	37.1044	San Joaquin River	US Army Corps of Engineers	CDEC	2010-01-20	2019-10-01	3-stable cool	14.24606944425611	19.20733044448573	300	4.506865405050949	REG
HSP	HOSPITAL CREEK	-121.2308	37.6105	San Joaquin River	West Stanislaus ID / SJVDA	CDEC	2004-11-02	2019-10-01	2-variable warm	16.65423448430974	24.747983082852706	292	6.359138531798222	UNREG
IGO	CLEAR CREEK NEAR IGO	-122.524178	40.513206	Sacramento River	US Geological Survey & US Bureau of Reclamation	CDEC	1996-09-06	2019-10-01	3-stable cool	11.47752532336396	14.746467198093969	310	6.172784762394174	REG
JLF	SACRAMENTO RIVER AT JELLYS FERRY	-122.1897	40.3172	Sacramento River	US Bureau of Reclamation	CDEC	1994-01-01	2019-10-01	3-stable cool	11.966300415409751	14.146422803614906	304	6.330450894265864	REG
KWK	SACRAMENTO RIVER AT KESWICK	-122.444458	40.600983	Sacramento River	US Geological Survey & US Bureau of Reclamation	CDEC	1989-11-13	2019-10-01	3-stable cool	10.729468390662186	12.25430912982132	359	8.63460151406176	REG
LWS	LEWISTON (WATER QUALITY)	-122.803635	40.719311	North Coast	US Geological Survey & US Bureau of Reclamation	CDEC	1990-02-02	2019-10-01	3-stable cool	9.073709519092736	10.805201802881214	298	8.307014202257813	REG
MCH	MILL CREEK BELOW HWY 99	-122.10463	40.040058	Sacramento River	CA Dept of Water Resources/North Region Office	CDEC	2005-12-22	2019-10-01	2-variable warm	14.699581245265737	23.49376032519428	300	5.029808342783349	UNREG
MRB	SAN JOAQUIN R AT MAZE RD BRIDGE	-121.2276	37.6414	San Joaquin River	CA Dept of Water Resources	CDEC	2010-01-01	2019-10-01	2-variable warm	17.129309273078064	23.939863379551575	292	5.601487223613506	UNREG
MSS	MCCLOUD RIVER ABOVE SHASTA LAKE	-122.219	40.958	Sacramento River	Pacific Gas & Electric	CDEC	1989-11-13	2019-10-01	3-stable cool	10.451572560323855	15.707218124972336	291	4.704112678622057	REG
MTK	MARTIS CK NR TRUCKEE	-120.117699	39.328796	North Lahontan	US Army Corps of Engineers	CDEC	2004-08-12	2019-10-01	4-variable cool	10.458447664391887	18.834113975275915	299	0.506129132966279	REG
NFA	N FORK AMERICAN R AT AUBURN DAM	-121.057	38.852	Sacramento River	US Geological Survey	CDEC	1999-07-21	2019-10-01	3-stable cool	12.996972611620642	19.033686707235635	302	4.952201443648357	UNREG
NFH	TRINITY R ABV NF TRINITY NR HELENA	-123.114479	40.766533	North Coast	US Geological Survey & US Bureau of Reclamation	CDEC	2005-03-19	2019-10-01	3-stable cool	10.924237083367204	16.034752968381053	302	5.240175724556357	REG
NTR	NF TRINITY RIVER AT HELENA	-123.127	40.782	North Coast	US Geological Survey & US Bureau of Reclamation	CDEC	2000-10-16	2019-10-01	4-variable cool	11.303916482129502	19.12063539466071	302	2.2078287399831162	UNREG
OBS	STANISLAUS R NEAR ORANGE BLOSSOM BRIDGE	-120.765	37.791	San Joaquin River	CA Dept of Fish and Wildlife	CDEC	2001-03-09	2011-08-28	3-stable cool	12.971193402618535	15.922820633195418	309	5.346473054009973	REG
ORA	STANISLAUS R AT OAKDALE REC AREA	-120.867	37.771	San Joaquin River	CA Dept of Fish and Wildlife	CDEC	2001-03-09	2011-04-19	3-stable cool	13.308075525312065	16.780060744272433	300	4.970426496605507	REG
PMN	PIT RIVER NEAR MONTGOMERY CREEK	-122.016	40.843	Sacramento River	US Bureau of Reclamation	CDEC	1990-05-16	2019-10-01	4-variable cool	12.221000706462851	18.68708647136419	299	4.502847571546018	REG
RCL	RUSH CREEK NEAR LEWISTON	-122.834	40.725	North Coast	US Geological Survey & US Bureau of Reclamation	CDEC	2001-03-15	2019-06-29	4-variable cool	9.943126935875084	16.51048252867446	302	3.1709490998920344	UNREG
ROR	ROARING RIVER	-121.889	38.092	San Francisco Bay	CA Dept of Water Resources/Division of Environmental Service	CDEC	2009-05-28	2019-10-01	2-variable warm	16.14255132867646	22.04313814289431	298	4.398221073191036	UNREG
SCQ	TULE R BLW SUCCESS DAM	-118.9242	36.0567	Tulare Lake	US Army Corps of Engineers	CDEC	2010-01-20	2019-10-01	2-variable warm	14.333382511553683	22.426355484803807	319	4.04861090402242	REG
SDP	SAN JOAQUIN R NR DOS PALOS	-120.5015	36.994	San Joaquin River	CA Dept of Water Resources	CDEC	2009-12-03	2019-10-01	2-variable warm	17.692355071873482	25.650453080021926	292	6.816386238415544	UNREG
SHD	SHASTA DAM (WATER QUALITY)	-122.4253	40.7161	Sacramento River	US Bureau of Reclamation	CDEC	1990-09-01	2019-10-01	5-stable cold	10.396744966606974	11.926930305552736	16	43.23038675135016	REG
SJS	SAN JOAQUIN RIVER NEAR STEVINSON	-120.851	37.295	San Joaquin River	CA Dept of Water Resources/South Central Region Office	CDEC	2000-07-27	2019-10-01	2-variable warm	18.619382021303434	27.107428565243133	288	7.759978780309971	UNREG
SWA	SAN JOAQUIN R NR WASHINGTON RD	-120.587	37.11532	San Joaquin River	CA Dept of Water Resources/South Central Region Office	CDEC	2010-12-30	2019-10-01	2-variable warm	16.7568266001245	25.08063546115134	289	6.494183615425211	REG
TGC	TUOLUMNE R AT THE GRAND CYN OF TUOLUMNE	-119.659897	37.916588	San Joaquin River	US Geological Survey	CDEC	2007-11-28	2019-10-01	4-variable cool	8.70499849086196	16.280842999169018	312	2.0716806688063656	UNREG
TLK	TRINITY RIVER BELOW LIMEKILN GULCH	-122.919	40.673	North Coast	US Geological Survey & US Bureau of Reclamation	CDEC	2001-03-15	2019-06-29	3-stable cool	9.658997472817111	12.799631380994143	298	6.6103147415719	REG
WPC	TRINITY RIVER NEAR WEITCHPEC	-123.706	41.179	North Coast	US Bureau of Reclamation	CDEC	1997-05-05	2007-07-24	2-variable warm	13.58144748026091	20.572105020999274	303	4.636302677563409	UNREG
WRM	DRY CK BLW WARM SPRINGS DAM	-122.9994	38.7197	North Coast	US Army Corps of Engineers	CDEC	2010-01-20	2019-10-01	3-stable cool	11.580554113493362	12.532949101997211	334	8.204444102247876	REG
YRS	YUBA RIVER NEAR SMARTVILLE	-121.274124	39.235172	Sacramento River	Pacific Gas & Electric	CDEC	2001-03-22	2017-05-17	3-stable cool	10.347955774413636	12.26635694942483	316	7.576579795739506	REG
BSC_dam	NA	-122.409531	41.599193	North Coast	TNC	UCD	2008-07-30	2019-09-30	3-stable cool	12.088588332671474	15.300287746112662	286	5.348676384880806	REG
BSC_mouth	NA	-122.437764	41.593885	North Coast	CDFW	UCD	2008-03-11	2019-09-30	3-stable cool	12.135310941867463	15.499163719476986	283	5.116704789015887	REG
BSC_spring	NORTH ALCOVE SPRING	-122.414245	41.601736	North Coast	UCD	UCD	2008-03-10	2017-05-23	5-stable cold	11.704412173625752	11.802888183477007	148	22.223218163718045	REG
PC_mouth	NA	-122.429769	41.580704	North Coast	CDFW	UCD	2008-04-25	2019-09-30	3-stable cool	13.087781292967351	19.40415525181683	286	4.389910235423537	UNREG
SR_abv_BSC	NA	-122.439263	41.592587	North Coast	CDFW	UCD	2008-08-13	2019-09-30	3-stable cool	12.851053506402156	18.88831593947099	286	4.462890712523138	REG
SR_abv_Parks	NA	-122.429396	41.580892	North Coast	CDFW	UCD	2008-03-26	2019-09-30	3-stable cool	12.59442504419919	18.07085916970419	287	4.713192054645654	REG
